# Supplementary material for: Intraspecific Convergence of Flower Size Correlates With Pollinator Size on Different Mountains: A Case Study of a Bumblebee-Pollinated Lamium (Lamiaceae) Flowers in Japan
Source: Research Square preprint supplement (doi:10.21203/rs.3.rs-175528/v1), 2021-02-05
Supplement: Supplementary file 1 [file 33c84095bdd8cbb1acb5cb1d.xlsx]

## Sheet: TableS2
	Predictive variables and coefficients
Intercept	Altitude	Average pollinator size (all pollinators)	Average pollinator size (only large bees)	Average plant height	Degrees of freedom	Log likelihood	AIC	Delta	Weight
20.91			0.2539	0.05243	4	-8.886	25.8	0	0.239
20.75		0.09309	0.1641	0.05733	5	-7.94	25.9	0.11	0.226
20.84	0.0005568		0.232	0.04992	5	-8.536	27.1	1.3	0.125
23.46			0.2801		3	-10.858	27.7	1.94	0.09
20.74	0.0002657	0.08291	0.1635	0.0556	6	-7.86	27.7	1.95	0.09
20.68	0.2274	0.07249			4	-10.153	28.3	2.53	0.067
23.21	0.0007317	0.2496			4	-10.426	28.9	3.08	0.051
23.52	0.06774	0.2165			4	-10.519	29	3.27	0.047
20.66	0.0003022	0.2153	0.07045		5	-10.084	30.2	4.4	0.027
23.31	0.0005769	0.04731	0.2117		5	-10.27	30.5	4.77	0.022
24.48	0.2517				3	-13.066	32.1	6.36	0.01
24.17	0.000745	0.2199			4	-12.803	33.6	7.83	0.005
21.21	0.002702	0.07468			4	-15.696	39.4	13.62	0
24.94	0.003227				3	-16.965	39.9	14.16	0
22.01	0.1118				3	-18.493	43	17.21	0
28.46					2	-20.291	44.6	18.81	0
