# Supplementary material for: Intraspecific Convergence of Flower Size Correlates With Pollinator Size on Different Mountains: A Case Study of a Bumblebee-Pollinated Lamium (Lamiaceae) Flowers in Japan
Source: Research Square preprint supplement (doi:10.21203/rs.3.rs-175528/v1), 2021-02-05
Supplement: Supplementary file 2 [file d6002c18c988a8a92f4d9f4b.xlsx]

## Sheet: TableS3
Marker name		Primer sequences (5'-3')	Repeat motif	Size range	GenBank accession no.
LA5	F:	tgccaaacggcccatattc	aat	218-315	KC621919
	R:	actgaatttgcacagtgatcttg
LA7	F:	gaagcctagtgaggcggtg	aag	190-221	KC621925
	R:	ctccctaagtcgtttctcgtg
LA16	F:	agtcacatggaactgatggaag	aat	324-372	KC621927
	R:	ctgtacggcgcagatttcg
LA25	F:	ggaagggatgtcagtcaggg	aatt	276-337	KC621921
	R:	gttggctcctgtaagatgcac
LA34	F:	cgtacgctacaggcagaac	att	246-258	KC621926
	R:	agacacaatgctagccatcc
LA35	F:	tctccactcgttaatcgcac	aatc	220-274	KC621923
	R:	attacatgatgggattaggacaac
LA54	F:	caactggtgaagaccatcgc	acat	262-342	KC621922
	R:	gacaattctcgctccaaccg
LA55	F:	tccagagcttcccgatacc	acat	241-273	KC621924
	R:	actatggcgctcagcaaatg
LA58	F:	tcatcacaagaaatggtcgacag	agc	110-182	KC621929
	R:	cctgcgagtcgttgtttcc
LA63	F:	agcctcgaacactgactcc	att	213-257	KC621928
	R:	cactcactctgccaatagcc
