# Supplementary material for: Intraspecific Convergence of Flower Size Correlates With Pollinator Size on Different Mountains: A Case Study of a Bumblebee-Pollinated Lamium (Lamiaceae) Flowers in Japan
Source: Research Square preprint supplement (doi:10.21203/rs.3.rs-175528/v1), 2021-02-05
Supplement: Supplementary file 3 [file f6e6f1b7fc16a4431887b4af.xlsx]

## Sheet: TableS1
West area						East area
Location	Species	Visitation mode	Insect size (mm, mean ± SE)	N =		Location	Species	Visitation mode	Insect size (mm, mean ± SE)	N =
Shimashima I	Ceratina megastigmata	Whole-body	7.27 ± 0.07	2		Fujiidani	Apis cerana japonica	Thrust	12.55 ± 0.19	8
	Ceratina japonica	Whole-body	11.75 ± 0.36	13			B. ardens W	Thrust	11.47	1
	Lasioglossum occidens	Whole-body	14.8	1			B. hypocrita Q*	Nectar robber	13.73	1
							C. japonica	Whole-body	11.93 ± 0.21	7
Shimashima II	Lasioglossum speculinum	Whole-body	6.98	1			Euodynerus nipanicus*	Whole-body	no mesured	1
	C. japonica	Whole-body	12.58 ± 0.56	5			Euc. nipponensis	Thrust	11.94 ± 0.25	8
	Eucera nipponensis	Thrust	13.45	1			Eucera spurcatipes	Thrust	14.05 ± 0.21	5
							Lasioglossum mutilum	Whole-body	14.09	1
Ohmizusawa	Andrena liridiloma	Whole-body	12.04	1			Nomada comparata*	Whole-body	no mesured	1
	Bombus honshuensis Q	Thrust	16.16 ± 0.16	2			Xylocopa appendiculata circumvolans*	Nectar robber	13.85 ± 0.34	8
	Bombus consobrinus W	Thrust	19.74 ± 0.40	3
	B. consobrinus Q	Thrust	27.26 ± 0.26	3		Santanda	Apis mellifera*	Nectar robber	9.45 ± 0.15	26
	Bombus hypocrita Q*	Nectar robber	16.62	1			C. japonica	Whole-body	12.21 ± 0.15	19
	C. japonica	Whole-body	12.24 ± 0.24	16			Euc. nipponensis	Thrust	12.08 ± 0.91	4
	Ceratina megastigmata	Whole-body	11.19 ± 0.18	26			L. speculinum	Whole-body	5.88	1
							X. appendiculata circumvolans*	Nectar robber	9.85 ± 0.18	3
Onosawa	Bombus diversus Q	Thrust	21.76	1
	C. japonica	Whole-body	12.05 ± 0.31	14		Ushifuse	A. mellifera*	Nectar robber	9.08 ± 0.15	15
	C. megastigmata	Whole-body	11.32 ± 0.24	8			B. hypocrita Q*	Nectar robber	14.5	1
	L. speculinum	Whole-body	8.13 ± 0.15	5			C. japonica	Whole-body	12.83 ± 0.18	21
	Lasioglossum nipponense*	Whole-body	9.52	1			C. megastigmata	Whole-body	9.24 ± 1.10	4
	L. occidens*	Whole-body	12.87	1			Euc. nipponensis	Thrust	11.85 ± 0.11	2
	Nomada spp.*	Whole-body	5.77	1			Euc. spurcatipes	Thrust	13.44 ± 0.15	8
Mitsumata	B. consobrinus Q	Thrust	27.09 ± 0.62	10		Nakayamasawa	Ap. mellifera*	Nectar robber	9.60 ± 0.05	2
	B. honshuensis Q	Thrust	16.62	1			B. consobrinus W	Thrust	17.71 ± 0.87	3
	C. megastigmata	Whole-body	12.97 ± 0.19	2			B. consobrinus Q	Thrust	27.69 ± 0.90	2
	L. speculinum	Whole-body	7.6	1			B. diversus W	Thrust	17.48 ± 0.48	8
							B. diversus Q	Thrust	23.46 ± 0.90	3
Norikura	Andrena omogensis	Whole-body	8.85	1			B. honshuensis W	Thrust	13.53 ± 0.09	2
	Bombus ardens W	Thrust	11.01 ± 0.50	4			B. honshuensis Q	Thrust	16.31	1
	B. consobrinus W	Thrust	21.18 ± 0.61	6			B. hypocrita W*	Nectar robber	11.39 ± 0.30	8
	B. honshuensis W	Thrust	15.56 ± 1.10	9			B. hypocrita Q*	Nectar robber	15.58 ± 0.36	9
							C. japonica	Whole-body	11.91 ± 0.24	2
Ougisawa	B. consobrinus W	Thrust	21.95	1			C. megastigmata	Whole-body	11.27 ± 0.26	2
	B. consobrinus Q	Thrust	27.86	1			X. oppendiculata circumvolans*	Nectar robber	13.56	1
						Hirokoba	B. consobrinus W	Thrust	19.62	1
							B. consobrinus Q	Thrust	27.3	1
Q: queen
W: worker
*: no pollen grains were found on the bodies of these insects
